# Supplementary material
Source: MDPI journal article supplement (https://www.mdpi.com/2073-4344/13/3/594)
Supplement: s1 [file s1]

# Effects of Different Reductive Agents on Zn-Promoted Iron Oxide Phases in the CO<sub>2</sub>-Fischer-Tropsch to Linear $\alpha$ -Olefins

Yueshen Pan <sup>1</sup>, Xiaoxu Ding <sup>1</sup>, Chao Zhang <sup>2</sup>, Minghui Zhu <sup>1</sup>, Zixu Yang <sup>1,\*</sup>  
and Yi-Fan Han <sup>1,3,\*</sup>

<sup>1</sup> State Key Laboratory of Chemical Engineering, School of Chemical Engineering, East China University of Science and Technology, Shanghai 200237, China

<sup>2</sup> Institute of (Bio)pharmaceutical research, Institute of Zhejiang University-Quzhou, Quzhou 324000, China

<sup>3</sup> Engineering Research Center of Advanced Functional Material Manufacturing, Ministry of Education, Zhengzhou University, Zhengzhou 450001, China

\* Correspondence: zixu.yang@ecust.edu.cn (Z.Y.); yifanhan@ecust.edu.cn (Y.-F.H.)

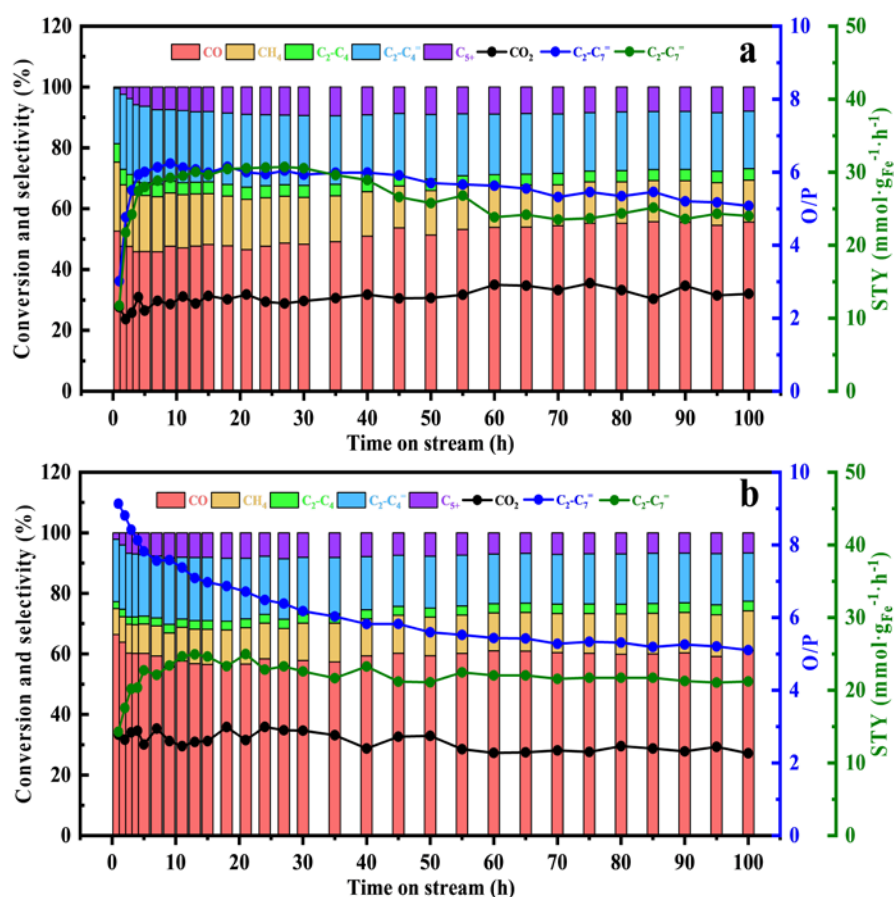

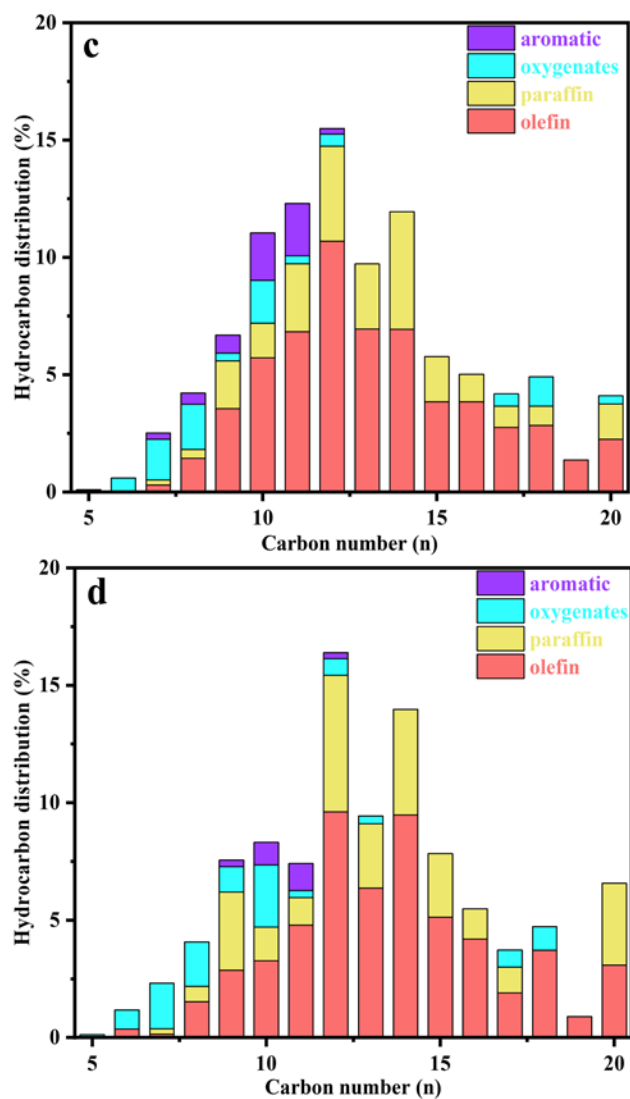

**Figure S1.** 100 h time on stream of the Fe<sub>2</sub>Zn<sub>1</sub> activated by (a) 5%CO/5%H<sub>2</sub>/Ar and (b) 10%H<sub>2</sub>/Ar and 100 h liquid product analysis of the Fe<sub>2</sub>Zn<sub>1</sub> activated by (c) 5%CO/5%H<sub>2</sub>/Ar and (d) 10%H<sub>2</sub>/Ar under reaction conditions (330 °C, 1.5 MPa, 60, 000 mL•g<sup>-1</sup>•h<sup>-1</sup>).

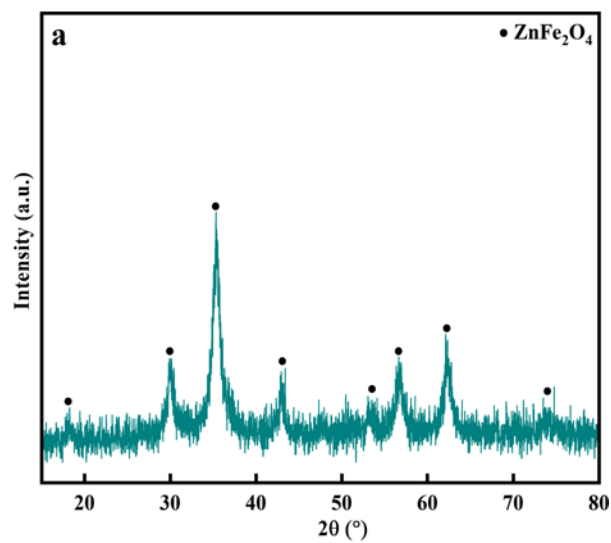

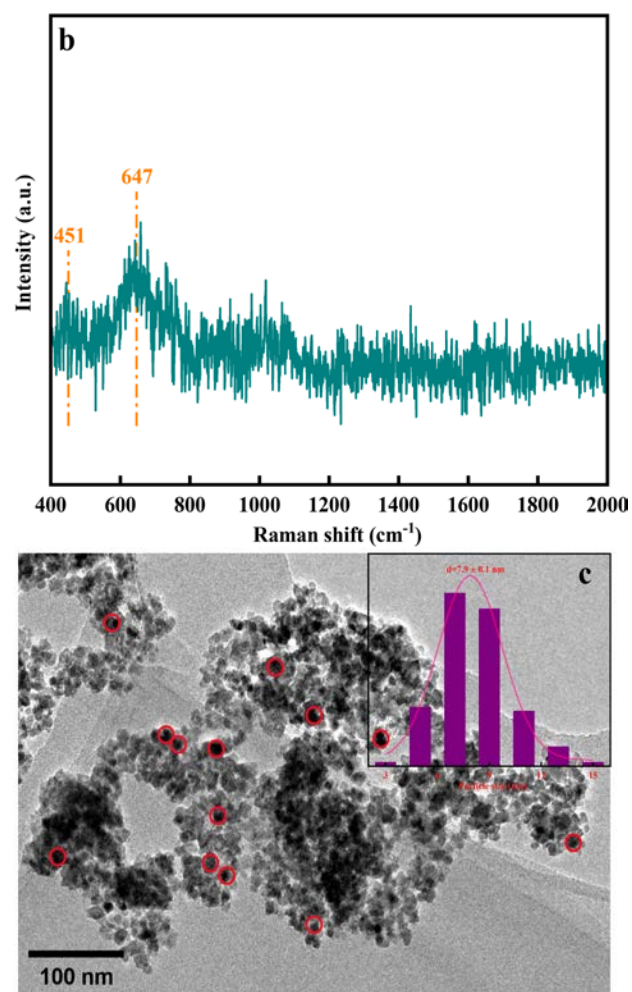

Figure S2. (a) XRD, (b) Raman, and (c) TEM of the fresh catalyst.

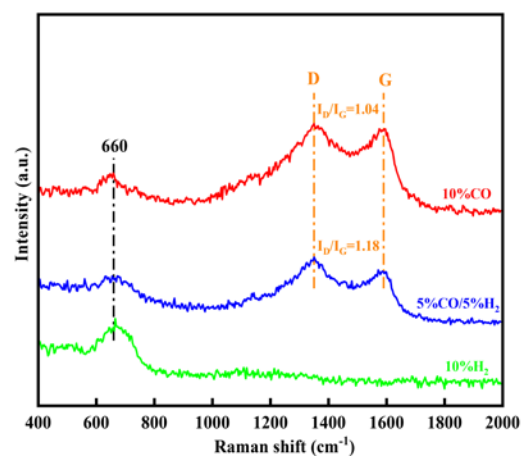

Figure S3. Raman of the activated catalysts.

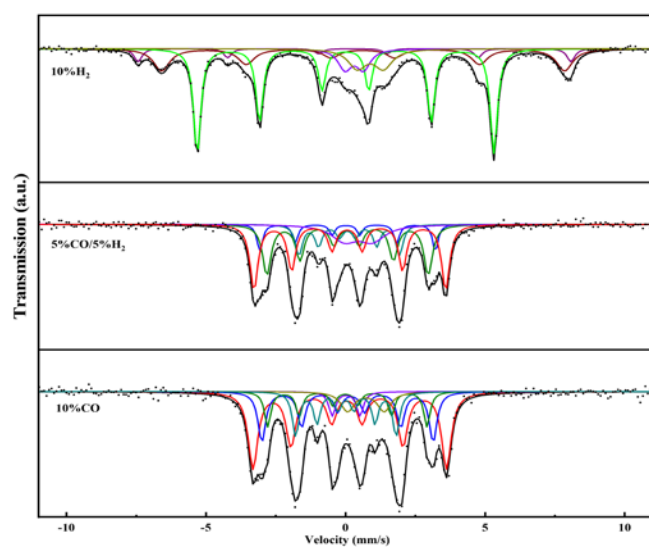

**Figure S4.** Moössbauer spectra of the activated catalysts.

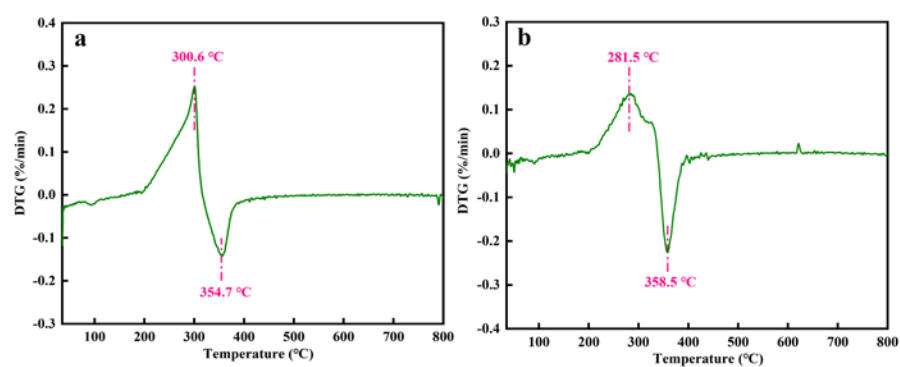

**Figure S5.** DTG curves of the (a) 10%CO- and (b) 5%CO/5%H<sub>2</sub>-activated catalysts.

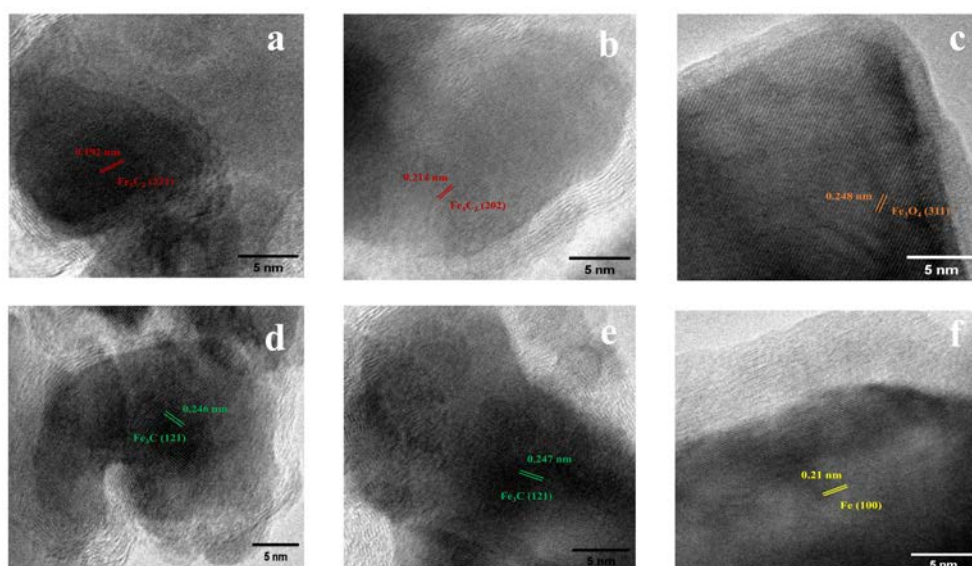

**Figure S6.** HRTEM images of the (a and d) 10%CO-, (b and e) 5%CO/5%H<sub>2</sub>-, (c and f) 10%H<sub>2</sub>-activated catalysts.

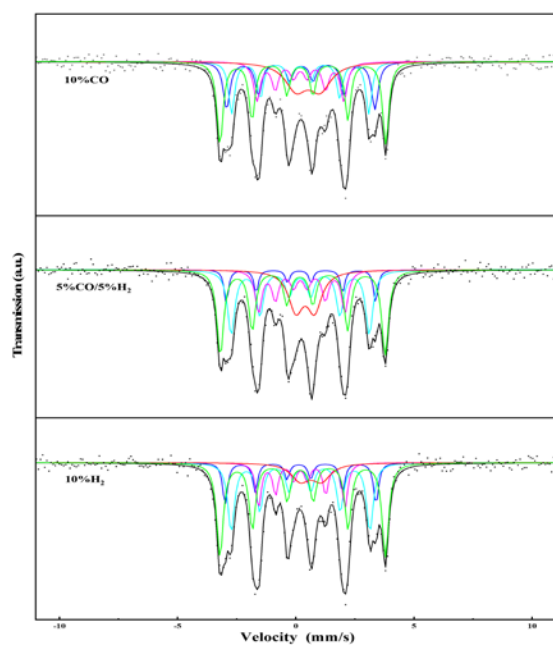

Figure S7.  $^{55}\text{Mo}$  Mossbauer spectra of the spent catalysts.

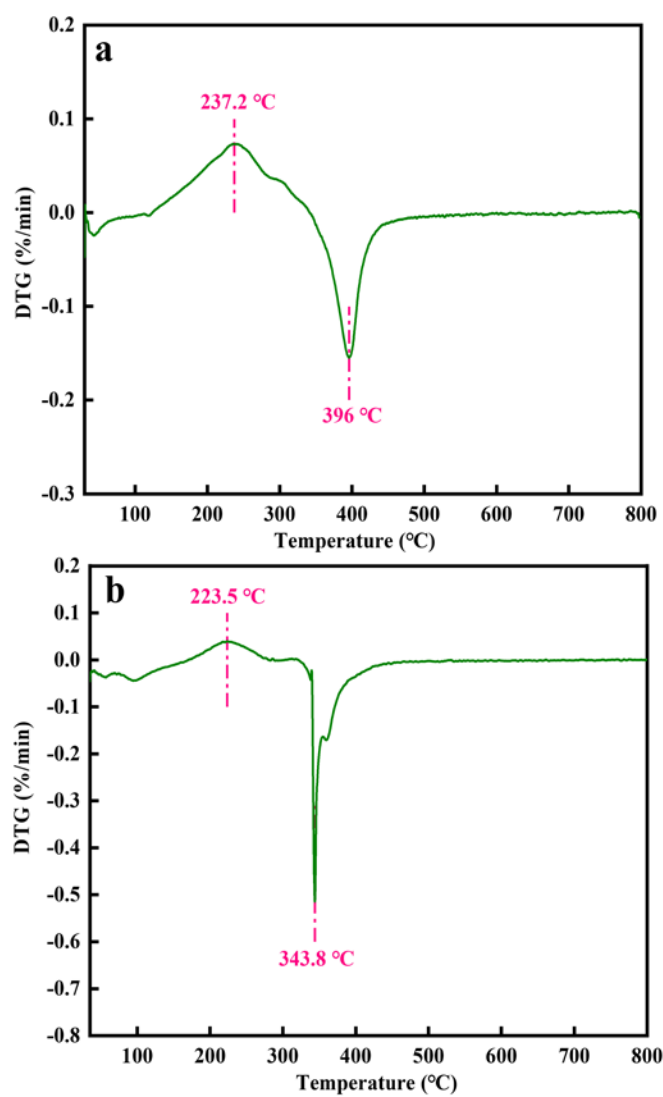

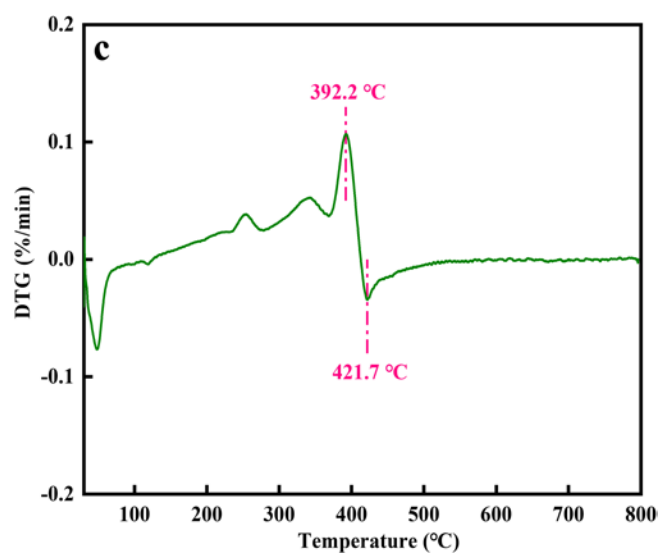

Figure S8. DTG curves of the spent catalysts of (a) 10%CO-, (b) 5%CO/5%H<sub>2</sub>- and (c) 10%H<sub>2</sub>-pretreated.

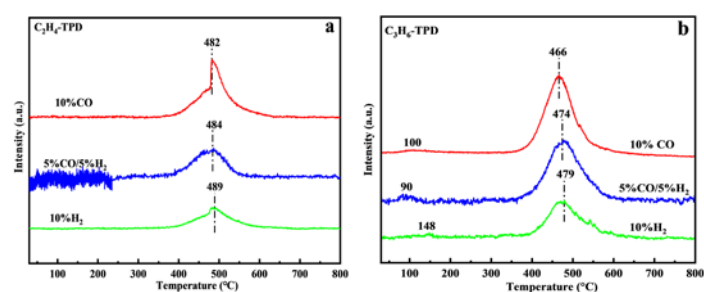

Figure S9. (a) C<sub>2</sub>H<sub>4</sub>-TPD and (b) C<sub>3</sub>H<sub>6</sub>-TPD of the spent catalysts.

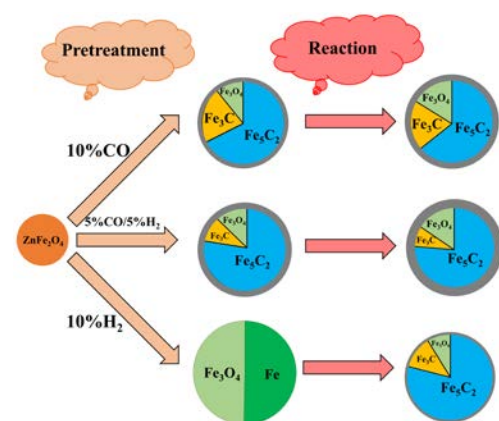

Figure S10. Structural and phase composition of the catalyst after pretreatment and reaction.

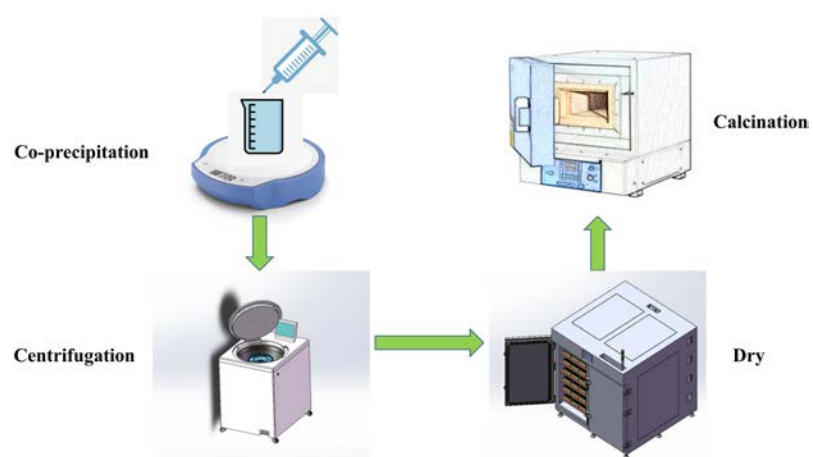

**Figure S11.** Schematic representation of the catalysts preparation.
